# Supplementary material for: Emergence of long afterglow and room temperature phosphorescence emissions from ultra-small sulfur dots
Source: Royal Society of Chemistry journal article supplement (doi:10.1039/d1ma00902h), 2022-01-01
Supplement: d1ma00902h1.pdf [file d1ma00902h1.pdf]

## Supporting Information

### **Emergence of Long Afterglow and Room Temperature Phosphorescence Emission from Ultra Small Sulfur Dots**

Karthika S Sunil<sup>1#</sup>, Kommula Bramhaiah<sup>1#</sup>, Srayee Mandal<sup>1</sup>, Subhajit Kar<sup>1</sup>, Neena S John<sup>2</sup>,  
and Santanu Bhattacharyya<sup>1\*</sup>

<sup>1</sup>Indian Institute of Science Education and Research Transit Campus, Govt. ITI Building  
(transit campus), Engg. School Road, Berhampur, Odisha-760010 (India)

<sup>2</sup>Centre for Nano and Soft Matter Sciences (CeNS), Arkavathi Campus, Survey No.7,  
Shivanapura, Dasanapura Hobli, Bangalore – 562162 (India)

E-mail: santanub@iiserbpr.ac.in

#-Equal Contributions

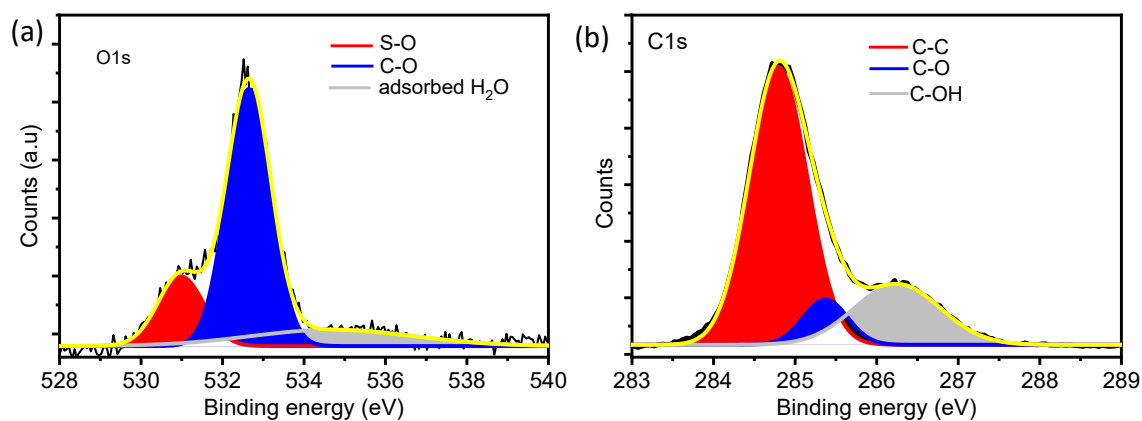

**Figure S1.** Deconvoluted (a) O1s and (b) C1s spectra of as-synthesized S-dots employing mechanical grinding assisted approach.

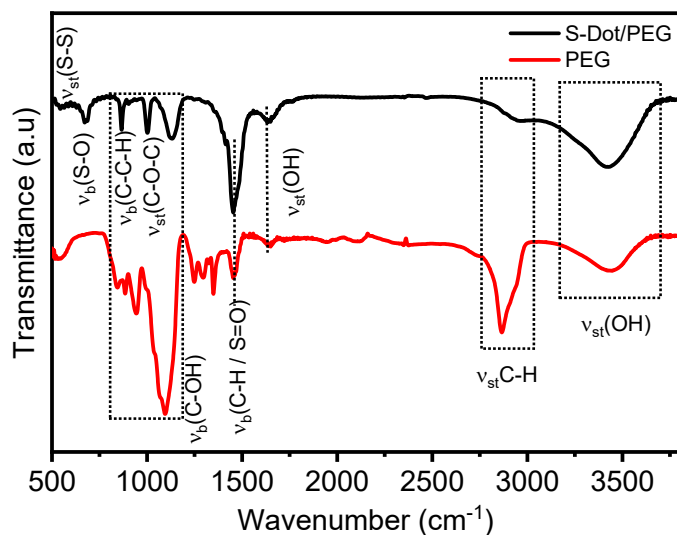

**Figure S2.** FTIR spectra of S-dots synthesized employing mechanical grinding assisted synthesis approach and PEG molecules.

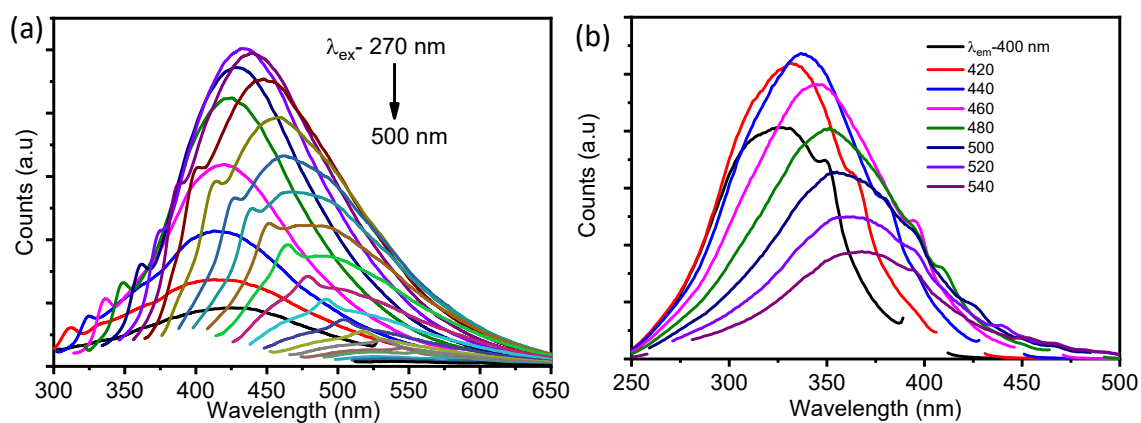

**Figure S3.** (a) Fluorescence emission spectra with  $\lambda_{ex}$  of 270 nm to 500 nm with increasing 10 nm (b) fluorescence excitation spectra at various emission wavelengths of S-dots.

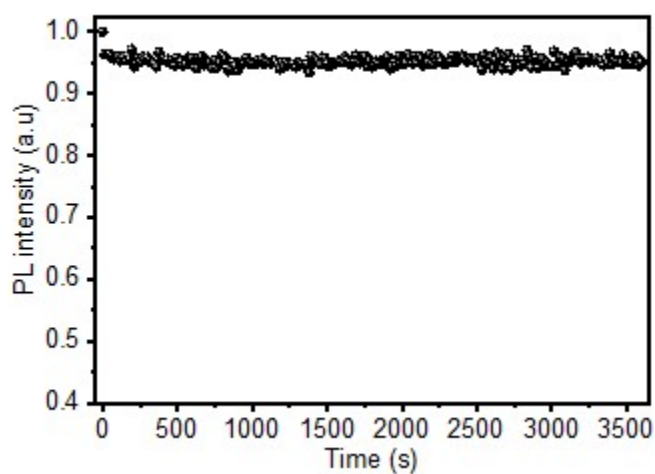

**Figure S4.** Fluorescence stability plot of S-dots.

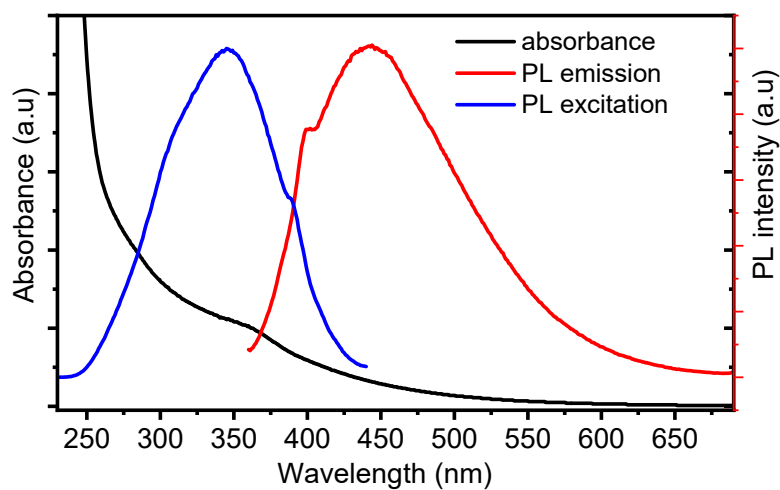

**Figure S5.** Absorbance, PL emission, and PL excitation spectra of S-dots synthesized employing mechanical grinding approach after 3 months.

**Table S1.** Time-resolved lifetime data of as-synthesized S-dots employing a mechanical grinding approach at various excitation wavelengths.

| Sample | $\lambda_{\text{ex}}$ (nm) | $A_1$ | $\tau_1$ (ns) | $A_2$ | $\tau_2$ (ns) | $\langle\tau\rangle$ (ns) |
|--------|----------------------------|-------|---------------|-------|---------------|---------------------------|
| S-dots | 340                        | 0.80  | 1.72          | 0.20  | 8.33          | 3.04                      |
|        | 375                        | 0.76  | 0.41          | 0.24  | 3.46          | 1.14                      |
|        | 450                        | 0.79  | 0.13          | 0.21  | 2.74          | 0.68                      |

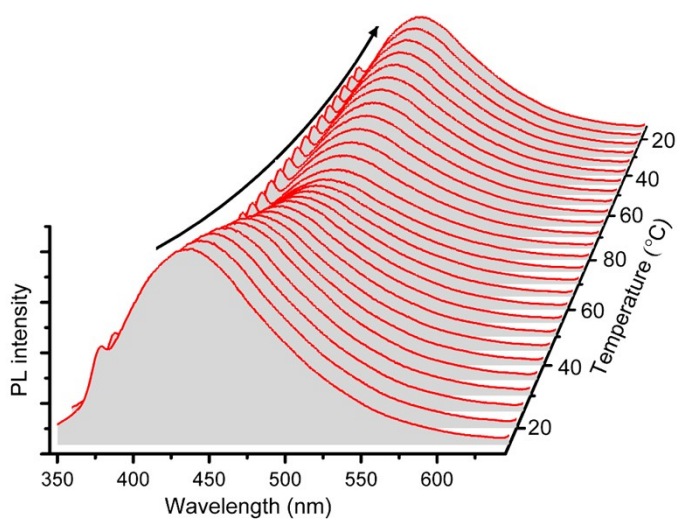

Figure S6. Thermo-responsive PL spectra of S-dots by varying the temperature from 15 °C to 80 °C, and 80 °C to 15 °C; heating and cooling processes, respectively.

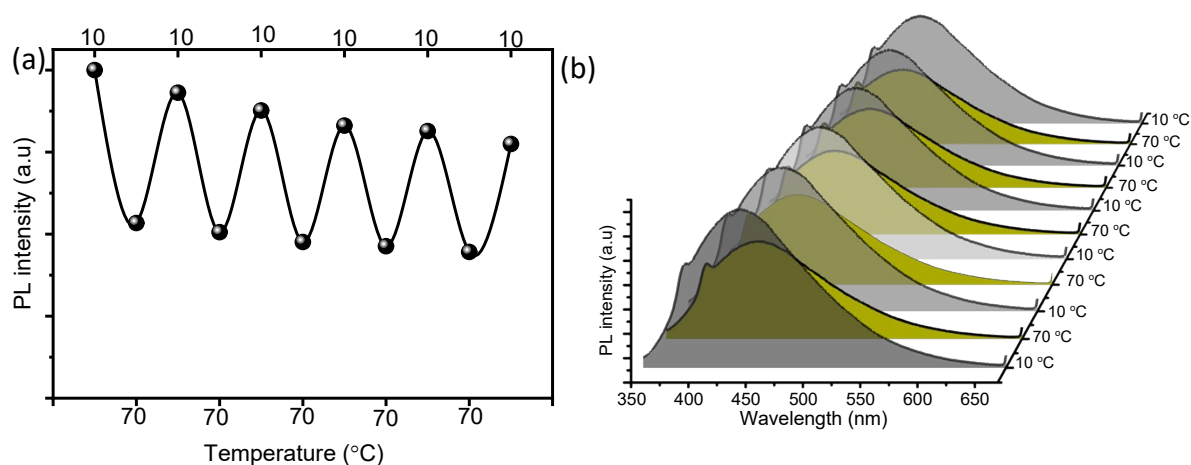

**Figure S7.** (a) Plot of PL intensity versus temperature (b) PL emission spectra of S-dots at various cooling (10 °C) and heating (10 °C) cycles for the as-synthesized employing mechanical grinding approach.

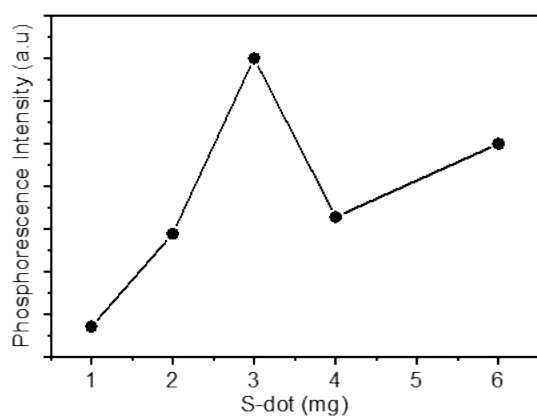

**Figure S8.** phosphorescence intensity by varying the S-dot (wt) in the boron oxide matrix.

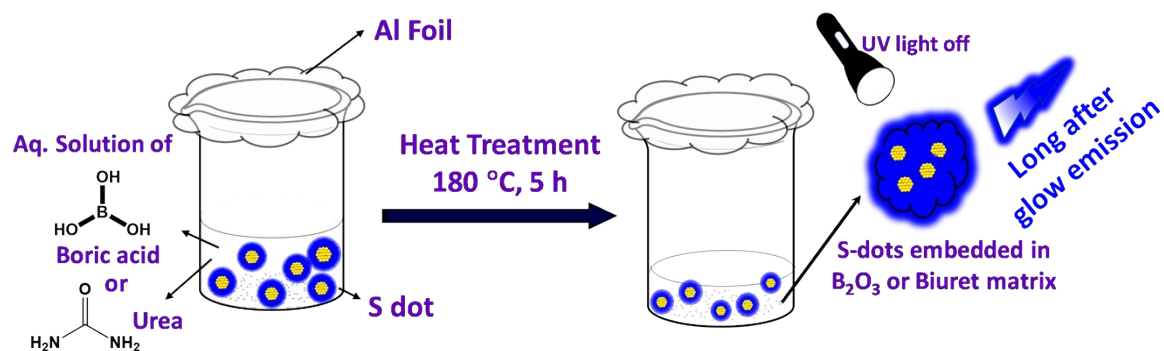

**Figure S9.** Schematic representation of synthesis process for the S-dots-B<sub>2</sub>O<sub>3</sub> composite and S-dots-biuret composite.

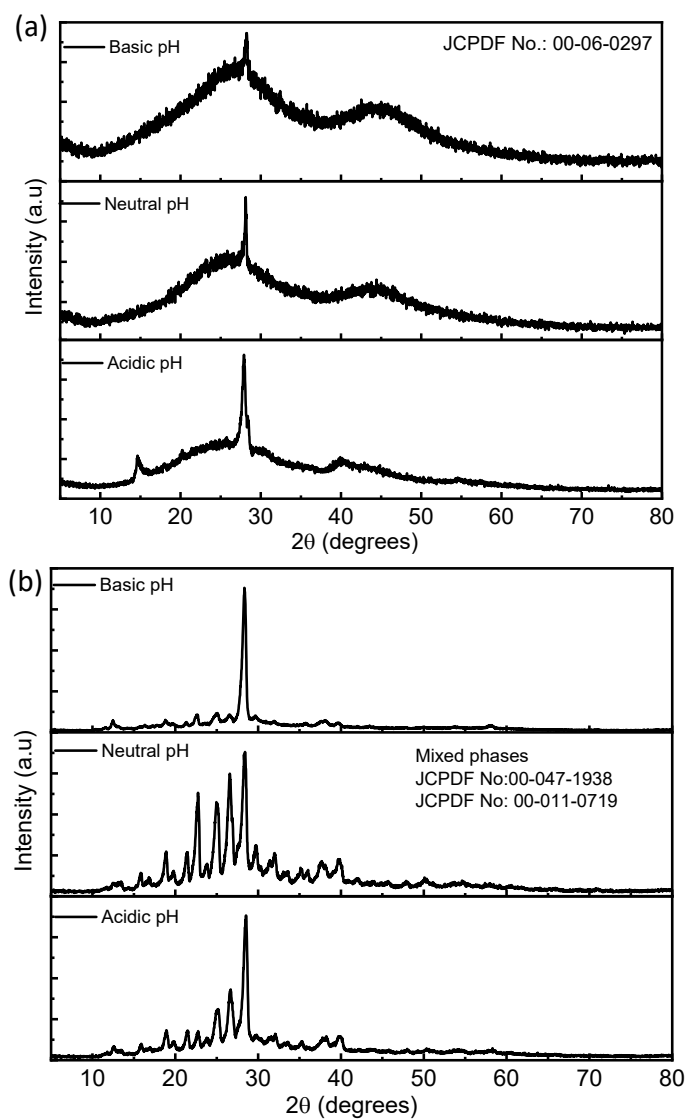

**Figure S10.** XRD spectra of S-dots embedded in various matrixes such as boron oxide and biuret matrix (a) S-dots in boron oxide matrix at various pH (acidic, neutral, and basic) (b) S-dots in biuret matrix at various pH (acidic, neutral, and basic).

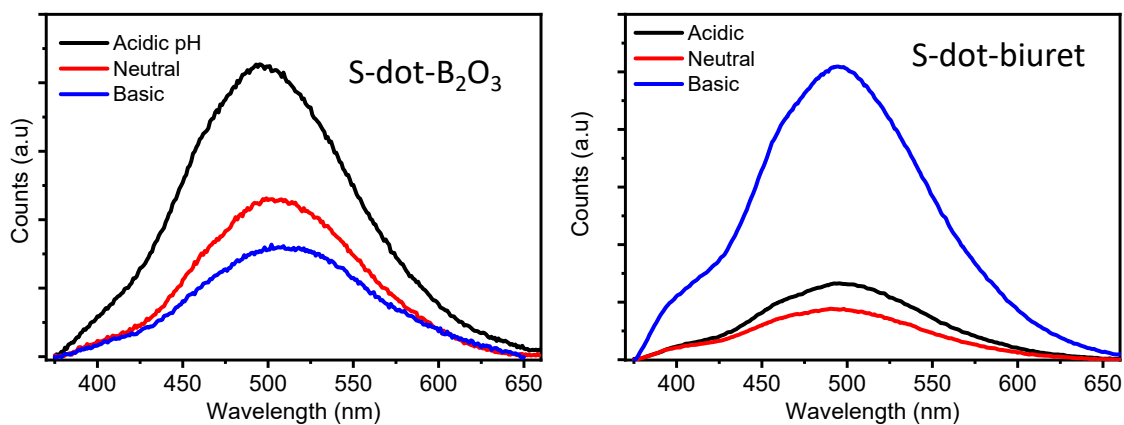

**Figure S11.** Phosphorescence spectra of S-dots embedded in various matrixes such as boron oxide and biuret matrix: S-dots in boron oxide matrix at various pH (acidic, neutral, and basic) and S-dots in biuret matrix at various pH (acidic, neutral, and basic).

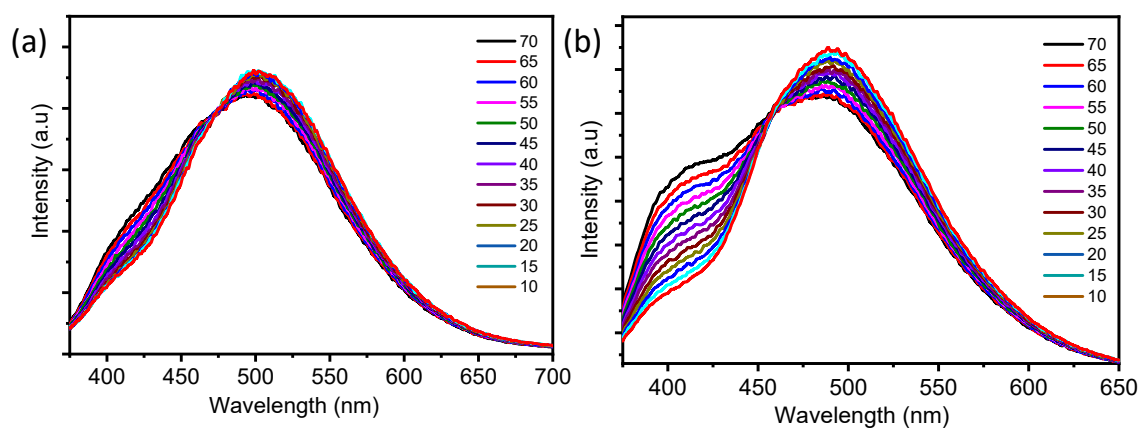

**Figure S12.** (a) Thermo-responsive phosphorescence spectra of S-dots/B<sub>2</sub>O<sub>3</sub> composite by varying the temperature (cooling process) (b) thermo-responsive phosphorescence spectra of S-dots/biuret composite by varying the temperature (cooling process).

**Table S2.** Phosphorescence lifetime data of as-synthesized S-dots-B<sub>2</sub>O<sub>3</sub> and S-dot-biuret composites at 365 nm excitation wavelength and heating (70 °C) and cooling (10 °C) processes.

| Sample                                        | Temperature |     | A <sub>1</sub> | τ <sub>1</sub> (ms) | A <sub>2</sub> | τ <sub>2</sub> (ms) | <τ> (ms) |
|-----------------------------------------------|-------------|-----|----------------|---------------------|----------------|---------------------|----------|
| S-dot-B <sub>2</sub> O <sub>3</sub> composite | 10 °C       | RTP | 0.45           | 48.820              | 0.54           | 602.77              | 351.85   |
|                                               | 70 °C       | RTP | 0.62           | 49.090              | 0.37           | 463.1               | 204.34   |
| S-dot-biuret composite                        | 10 °C       | RTP | 0.47           | 53.930              | 0.53           | 549.43              | 316.54   |
|                                               | 70 °C       | RTP | 0.59           | 38.030              | 0.41           | 418.84              | 194.15   |

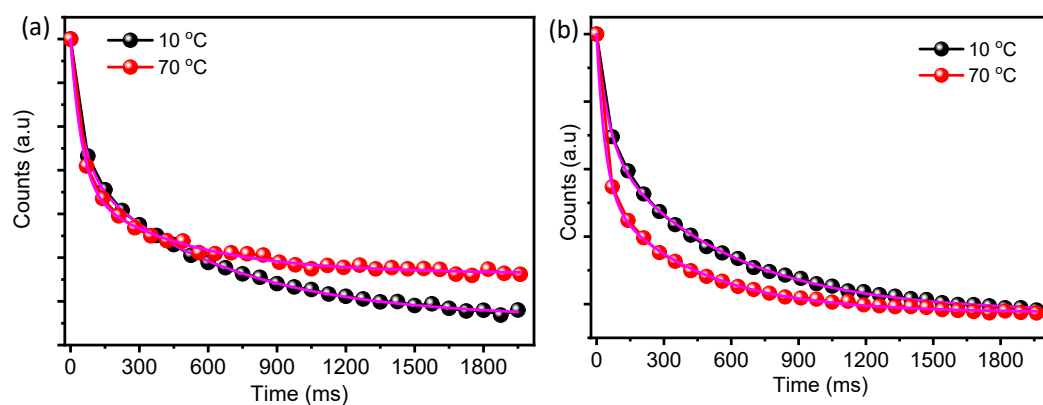

**Figure S13.** Phosphorescence lifetime data of S-dots in B<sub>2</sub>O<sub>3</sub> and biuret matrix at heating (70 °C) and cooling (10 °C) process (a) phosphorescence lifetime data of S-dot/B<sub>2</sub>O<sub>3</sub> composite (b) phosphorescence lifetime data of S-dot/biuret composite; fitted with biexponential decay kinetics.

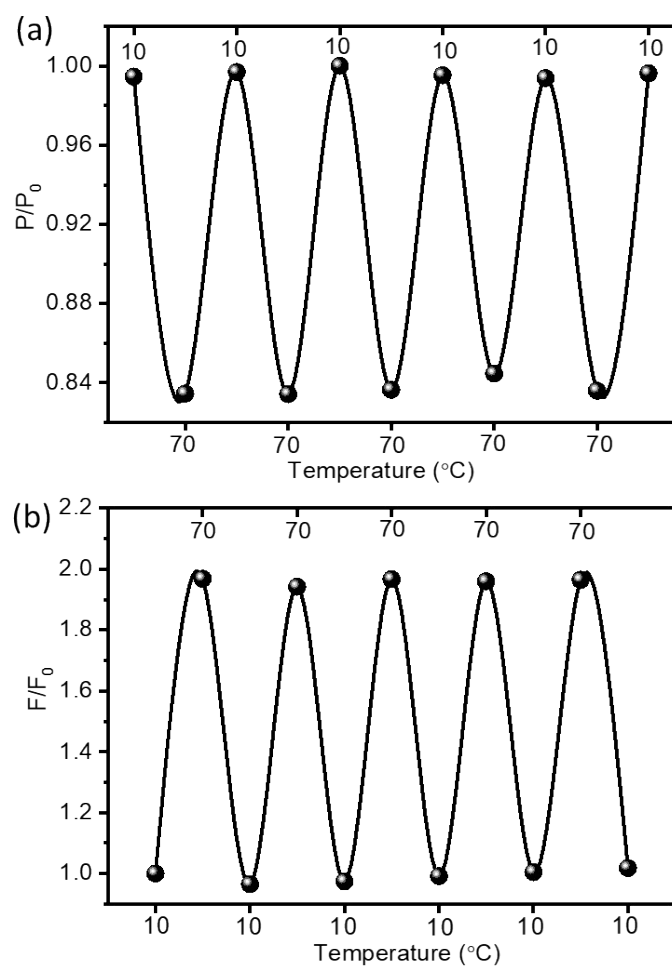

**Figure S14.** Temperature-dependent cycling stability plot for the (a) phosphorescence and (b) TADF of the S-dot-biuret composite at heating (70 °C) and cooling (10 °C) processes.
